1 Sex-dependent development of *Kras*-induced anal squamous cell carcinoma in mice

2

3 Morgan T. Walcheck<sup>1</sup>, Kristina A. Matkowskyj<sup>3,4,5</sup>, Anne Turco<sup>2</sup>, Simon Blaine-Sauer<sup>1</sup>, Manabu

4 Nukaya<sup>2</sup>, Jessica Noel<sup>1</sup>, Oline K. Ronnekleiv<sup>6</sup>, Sean M. Ronnekleiv-Kelly<sup>1,2,3</sup>

5

6 <sup>1</sup> University of Wisconsin, McArdle Laboratory for Cancer Research, 1400 University Avenue,  
7 McArdle Research Building, Madison, WI, 53706, USA

8

9 <sup>2</sup> University of Wisconsin School of Medicine and Public Health, Department of Surgery, Division  
10 of Surgical Oncology, K4/748 CSC, 600 Highland Avenue, Madison, WI 53792, USA

11

12 <sup>3</sup> University of Wisconsin Carbone Cancer Center, Madison, WI 53705, USA

13

14 <sup>4</sup> University of Wisconsin School of Medicine and Public Health, Department of Pathology and  
15 Laboratory Medicine, L5/183 CSC, 600 Highland Avenue, Madison, WI 53792, USA

16

17 <sup>5</sup> William S. Middleton Memorial Veterans Hospital, Madison, WI 53705, USA

18

19 <sup>6</sup> Oregon Health Sciences University, Department of Chemical Physiology and Biochemistry,  
20 Portland, OR, 97239, USA

21

22 \*Please address **correspondence** to Sean M. Ronnekleiv-Kelly, MD

23 Email: [ronnekleiv-kelly@surgery.wisc.edu](mailto:ronnekleiv-kelly@surgery.wisc.edu) (SRK)

24

25

26

27

28

29

30

31

32

33

34

## 35 **Abstract**

36  
37 Anal squamous cell carcinoma (SCC) will be diagnosed in an estimated 9,080 adults in the  
38 United States this year, and rates have been rising over the last several decades. Most people  
39 that develop anal SCC have associated human papillomavirus (HPV) infection (~85-95%), with  
40 approximately 5-15% of anal SCC cases occurring in HPV-negative patients from unknown  
41 etiology. This study identified and characterized a *Kras*-driven, female sex hormone-dependent  
42 development of anal squamous cell carcinoma (SCC) in the *LSL-Kras<sup>G12D</sup> ; Pdx1-Cre (KC)*  
43 mouse model that is not dependent on papillomavirus infection. One hundred percent of female  
44 KC mice develop anal SCC, while no male KC mice develop tumors. Both male and female KC  
45 anal tissue express *Pdx1* and *Cre*-recombinase mRNA, and the activated mutant *Kras<sup>G12D</sup>* gene.  
46 Although the driver gene mutation *Kras<sup>G12D</sup>* is present in anus of both sexes, only female KC  
47 mice develop *Kras*-mutant induced anal SCC. To understand the sex-dependent differences,  
48 KC male mice were castrated and KC female mice were ovariectomized. Castrated KC males  
49 displayed an unchanged phenotype with no anal tumor formation. In contrast, ovariectomized  
50 KC females demonstrated a marked reduction in anal SCC development, with only 15%  
51 developing anal SCC. Finally, exogenous administration of estrogen rescued the tumor  
52 development in ovariectomized KC female mice and induced tumor development in castrated  
53 KC males. These results confirm that the anal SCC is estrogen mediated. The delineation of the  
54 role of female sex hormones in mediating mutant *Kras* to drive anal SCC pathogenesis  
55 highlights a subtype of anal SCC that is independent of papillomavirus infection. These findings  
56 may have clinical applicability for the papillomavirus-negative subset of anal SCC patients that  
57 typically respond poorly to standard of care chemoradiation.

58

59

## 60 Introduction

61 In 2021, an estimated 9,080 adults will be diagnosed with anal squamous cell carcinoma  
62 (SCC) in the United States, and anal SCC has been increasing in incidence over the last  
63 several decades.[1,2] Anal SCC is typically associated with human papillomavirus (HPV)  
64 infection (~85-95%),[2,3] yet approximately 5-15% of anal SCC cases occur in HPV-negative  
65 patients with unknown etiology.[4,5] Unfortunately, patients with HPV-negative anal SCC are  
66 significantly less responsive to standard of care chemoradiation[5], and have a worse prognosis  
67 than HPV-positive anal SCC.[6] This study presents a novel etiology for HPV-negative anal  
68 SCC development driven by mutant *Kras*.

69 In human anal cancer, mutant *Kras* is identified in 10% of HPV-negative anal SCC  
70 samples.[7] Despite this association, to our knowledge, the present study is the first to identify  
71 this correlation in a pre-clinical model. The mutant *Kras*-driven development of anal SCC was  
72 detected in a genetically engineered mouse model (GEMM) traditionally used in the  
73 investigation of pancreatic ductal adenocarcinoma (PDAC). This mouse harbors a *Kras*-  
74 mutation (*Kras*<sup>G12D</sup>) in cells expressing Cre-recombinase from pancreatic and duodenal  
75 homeobox 1 (*Pdx1*) promoter (KC mice: *Lox-stop-lox Kras*<sup>G12D/+</sup> ; *Pdx1-Cre*)[8]. In this study, we  
76 found that *Pdx1* expression and consequent Cre-recombinase expression in the anal epithelium  
77 caused activation of the *Kras*<sup>G12D</sup> gene in the anal epithelium and tumor development. Further,  
78 we observed that only female mice developed anal SCC suggesting a sex-hormone dependent  
79 interaction with *Kras*<sup>G12D</sup> that triggers tumor formation.

80 Therefore, we sought to understand the sex-dependent development of anal SCC in KC  
81 mice. Activated *Kras*<sup>G12D</sup> was present in the anal tissue of both sexes of KC mice, suggesting  
82 both sexes have the potential to develop *Kras*-mutant anal SCC. To ascertain why only female  
83 KC mice develop tumors, we ovariectomized females and castrated males to eliminate  
84 endogenous sex hormones production in the mice and found ovariectomized females displayed

85 significantly reduced anal tumor development, signifying female sex hormone dependence. In  
86 turn, ovariectomized and castrated KC mice dosed with estrogen resulted in tumor development  
87 in both KC female and KC male mice, respectively, indicating the anal tumor development is  
88 estrogen mediated. This novel phenotype shows a female sex hormone dependent  
89 pathogenesis of *Kras*-mutant anal SCC that is independent of HPV infection. Given that 2-5% of  
90 anal SCC overall and 10% of HPV negative anal SCC harbor *Kras*-mutations [7], these findings  
91 may have therapeutic implications for this subset of patients. Lastly, the sex-based difference  
92 highlights the importance of characterizing both sexes in pre-clinical studies.

93

## 94 **Methods**

### 95 **Animals**

96 All animal studies were conducted according to an approved protocol (M005959) by the  
97 University of Wisconsin School of Medicine and Public Health (UW SMPH) Institutional Animal  
98 Care and Use Committee (IACUC). Mice were housed in an Assessment and Accreditation of  
99 Laboratory Animal Care (AALAC) accredited selective pathogen-free facility (UW Medical  
100 Sciences Center) on corncob bedding with chow diet (Mouse diet 9F 5020; PMI Nutrition  
101 International), and water *ad libitum*. The *Lox-Stop-Lox (LSL) Kras<sup>G12D</sup>* (B6.129S4-Kras<sup>tm4Tyj/J</sup>  
102 #008179), *Pdx1-Cre* (B6.FVB-Tg(*Pdx1-cre*)<sup>6Tuv/J</sup>) and Ai14 (B6.Cg-Gt(ROSA)26Sor<sup>tm14(CAG-</sup>  
103 <sup>tdTomato)Hze/J</sup> #007914) mice were purchased from the Jackson Laboratory (Bar Harbor, ME) and  
104 housed under identical conditions. All mice listed are congenic on a C57BL/6J background  
105 (backcrossing > 15 generations). The *LSLKras<sup>G12D</sup>* and *Pdx1-Cre* mice were bred to develop  
106 *LSL-Kras<sup>G12D</sup>* ; *Pdx1-Cre* (KC) mice. The Ai14, *Pdx1-Cre* and *LSLKras<sup>G12D</sup>* were bred to develop  
107 *Rosa26<sup>LSL-tdTomato</sup>* ; *LSLKras<sup>G12D</sup>* ; *Pdx1-Cre* (AiKC) mice. Genotyping was performed according  
108 to Jackson Laboratory's protocols (Cre: Protocol #21298, *Kras*: Protocol #29388 and Ai14:  
109 Protocol #29436). Original observations were performed in 16 male KC and 14 female KC mice

110 and 83 control genotypes. Based on stark sex-dependence, we calculated that 10 KC male, 10  
111 KC female, and 12 control mice were needed for castration / ovariectomy studies to detect a  
112 50% change in tumor formation by Fisher Exact test and alpha of 0.05. We then calculated that  
113 12 KC female mice would be sufficient for the E2 dosing studies (6 E2 dosed and 6 sham  
114 controls) as well as 12 KC male mice (6 E2 dosed and 6 sham controls). Finally, we used 6  
115 AiKC mice to visually confirm the location of Pdx1-Cre (projected location of mutant *Kras*  
116 expression) in the anal tissue. The health and well-being of the mice were monitored closely by  
117 research and veterinary staff. Mice that showed signs of distress such as disheveled coat,  
118 hunched posture, rapid weight loss, lack of feeding or lack of defecation were immediately  
119 euthanized. During the experiment process, one castrated KC male mouse was euthanized due  
120 to decline in health and one castrated KC male mouse, one E2 dosed ovariectomized KC  
121 female, one sham dosed castrated KC male and two E2 dosed castrated KC male mice were  
122 found deceased of uncertain circumstances before the study end point. These mice were not  
123 included in the results. Mice were euthanized through CO<sup>2</sup> asphyxiation.

124

## 125 **Genotyping for the activation of *Kras*<sup>G12D</sup> mutation construct**

126 Activated *Kras*<sup>G12D</sup> refers to the successful Cre-mediated excision of the *Lox-Stop* sequence,  
127 allowing for transcription of the mutant *Kras* allele. To determine the tissue specific activation of  
128 the *Kras*<sup>G12D</sup> mutation, we followed the standard method first published by Hingorani [8,9] and  
129 further utilized by other groups working with this *Lox-Stop-Lox* conditional *Kras* mouse  
130 strain[10–12]. Genomic DNA was isolated from tail, pancreas, anus and anal tumor from KC  
131 mice. The DNA was then amplified using polymerase chain reaction (PCR) with the following  
132 probes: 5'-GGGTAGGTGTTGGGATAGCTG-3' (OL8403) and 5'-  
133 CCGAATTCAGTGACTACAGATGTACAGAG-3' (OL8404) with conditions previously

134 published[11]. These primers amplified a 325 bp band corresponding to the activated *Kras*<sup>G12D</sup>  
135 mutant allele and a 285 bp band corresponding to the WT allele.

136

## 137 **Tumor studies**

138 The study endpoint (age 9 months) was selected based on existing data evaluating and  
139 reporting on male KC mice at this age[8]. At 9 months, mice were euthanized and underwent  
140 cervical dislocation followed by midline laparotomy for solid organ assessment. The anus was  
141 also removed for pathologic analysis. A board-certified surgical pathologist with subspecialty  
142 training in gastrointestinal pathology (KAM) who was blinded to the mouse genotype and sex  
143 evaluated the histologic sections.

144

## 145 **Histology**

146 KC mouse tissues (anus and pancreas) were fixed in 10% buffered formalin for 48 hours. Serial  
147 4 µm sections from paraffin-embedded tissues were mounted on charged slides. Hematoxylin  
148 and eosin (H&E) was performed by the Experimental Animal Pathology Lab (EAPL) at the  
149 University of Wisconsin-Madison. The histology was evaluated by a certified pathologist (KAM).

150

## 151 **DNA recovery from H&E stained formalin fixed paraffin 152 embedded (FFPE) samples**

153 The anal tissue was scraped from H&E stained slides using a sterile blade.[13] The  
154 deparaffinization and genome DNA extraction from H&E stained anal tissues was performed  
155 according to manufacturer's instructions using ReliaPrep FFPE gDNA MiniPrep System  
156 (Promega, Madison, WI).

157

## 158 **Tdtomato immunohistochemistry (IHC)**

159 IHC staining for red fluorescence protein (tdTomato) was performed by the Experimental Animal  
160 Pathology Lab (EAPL) at the University of Wisconsin-Madison. For IHC staining, sections were  
161 deparaffinized in xylenes and hydrated through graded alcohols to distilled water. Antigens were  
162 retrieved using citrate buffer pH 6.0 (10 mM Citric Acid, 0.05% tween 20). Endogenous  
163 peroxidase was blocked with 0.3% H<sub>2</sub>O<sub>2</sub> in PBS for 10 minutes at room temperature and  
164 blocking of non-specific binding was performed using 10% goat serum. Sections were incubated  
165 with rabbit anti-RFP antibody (600-401-379, Rockland Inc, Pottstown, PA) (1:1600) overnight at  
166 4°C. After rinsing, sections were incubated with ImmPRESS goat anti-rabbit IgG (MP-7451,  
167 Vector Laboratories, Burlingame, CA) for 30 minutes at room temperature. Detection was  
168 performed using DAB substrate kit (8059S, Cell Signaling Technology, Danvers, MA). Samples  
169 were counterstained using Mayer's hematoxylin (MHS32, Millipore-Sigma, St. Louis, MO) for  
170 one minute.

171

## 172 **RNAScope in situ hybridization**

173 MmuPV1 detection was performed using the RNAScope 2.5 HD Assay-Brown kit (Advanced  
174 Cell Diagnostics, Newark, CA; 322300) and probe to MmuPV1 E4 (473281) as previously  
175 described.[14] NSG mouse anal tissues that were infected with MmuPV1 or mock infected [14]  
176 were included as positive and negative controls, respectively.

177

## 178 **Estrogen receptor alpha immunofluorescence**

179 Formalin-fixed (10 % formalin), paraffin-embedded mouse tissue sections mounted on Superfrost  
180 Plus glass slides (Fisher Scientific, Pittsburgh, PA), were deparaffinized with Xylene (3 x 5 min),  
181 and rehydrated in descending concentrations of ethanol as follows: 2 x 10 min each in 100%,

182 95%, 70%, and 50% ethanol followed by two washes in deionized water for 5 min each and a final  
183 wash in phosphate buffer (PB; 0.1 M phosphate buffer, pH 7.4) solution for 10-15 min. Sections  
184 were pretreated with normal donkey serum solution (3% donkey serum, 0.3% Triton-X 100 in PB,  
185 pH 7.4) for 30 min at room temperature and then washed briefly in PB before being incubated for  
186 48 hrs at 4° C with an estrogen receptor  $\alpha$  (ER $\alpha$ ) rabbit antibody (C1355) diluted 1:5000.  
187 Thereafter the sections were rinsed in PB and next incubated with biotinylated donkey anti-rabbit  
188 IgG (1:500) for 2 hours at room temperature, another wash for 30 min in PB and then reacted with  
189 streptavidin Alexa Fluor 594 (1:2500) for 3 hrs. Both primary and secondary antisera were diluted  
190 in Tris-(hydroxymethyl)aminomethane (0.5%; Sigma-Aldrich) in phosphate buffer containing 0.7%  
191 seaweed gelatin (Sigma-Aldrich), 0.5% Triton X-100 (Sigma-Aldrich), and 3% BSA (Sigma-  
192 Aldrich), adjusted to pH 7.6. Adjacent sections were treated equally, but without the ER $\alpha$  antibody  
193 for control purposes. After a final rinse overnight in PB, the sections were cover-slipped with  
194 gelvatol containing the anti-fading agent 1,4-diazabicyclo(2,2)octane (DABCO; Sigma-Aldrich; 50  
195 mg/ml). Sections were screened and photographed using a Nikon E800 fluorescent microscope  
196 (Eclipse E800; Nikon Instruments, Melville, NY) equipped with a fiber illuminator (Intensilight C-  
197 HGFI; Nikon Instruments) and a high-definition digital microscope camera head (DS-Fi1; Nikon  
198 Instruments) interfaced with a PC-based camera controller (DS-U3; Nikon Instruments). It should  
199 be noted that the C1355 ER $\alpha$  antibody has been documented to be specific for ER $\alpha$  in rat and  
200 mouse tissues and does not recognize ER $\beta$ . [15]

201

## 202 **DNA recovery from FFPE tissues and MmuPV1 detection by**

### 203 **PCR**

204 DNA was isolated from two formalin fixed paraffin embedded slides per sample as previously  
205 described. [14] PCR was performed using primers specific to the MmuPV1 genome in the L1



206 region (F: 5'-GGAAGGAGAGAGCAAGTGTATG-3', R: 5'-GGGTTTGGTGTGTTGGTTTG-3')  
207 and analyzed via agarose gel.

208

## 209 **RNA isolation**

210 Immediately following cervical dislocation and resection of the organs, specimens  
211 (pancreas and anus) allocated for RNA isolation were placed into RNAlater (ThermoFisher  
212 Scientific, Waltham, MA). The RNA isolation commenced immediately using Qiazol lysis and  
213 homogenization using a tissue homogenizer (Brinkmann Instruments, Model PT 10/35, 110  
214 Volts, 6 Amps, 60 Hz). RNA was isolated using the Qiagen RNeasy Kit (Qiagen, Hilden,  
215 Germany). The extracted RNA was quantified using a spectrophotometer (ClarioStar Plate  
216 Reader, BMG LABTECH, Ortenberg Germany) and diluted to 50 ng/ $\mu$ L. Electrophoresis of the  
217 purified RNA was performed with the Agilent 2100 Bioanalyzer (Agilent, Santa Clara, CA), and  
218 each sample demonstrated an RNA Integrity Number (RIN) of 7.5 or higher, indicative of high-  
219 quality RNA.

220

## 221 **Quantitative reverse transcription PCR**

222 The qPCR was done as previously described.[16] Briefly, 500 ng of RNA was reverse  
223 transcribed using the High Capacity cDNA Reverse Transcription Kit (Thermo Fisher, Waltham,  
224 Ma) per manufacturer protocol. The qPCR was performed on the Thermo Fisher QuantStudio 7  
225 (Thermo Fisher, Waltham, Ma). All reactions were run in triplicate. Results were analyzed using  
226 the delta-delta CT method. Expression levels were calculated relative to the average of the  
227 C57BL6/J female mice (baseline) or the average of the KC females. The reference group was  
228 labeled on each graph. The following TaqMan® probes were used: *Cre* (Enterobacteria phage  
229 P1 cyclization recombinase, Mr00635245\_cn), *Pdx1* (pancreatic and duodenal homeobox 1,

230 Mm00565835\_cn) and the house keeping gene *Hprt* (hypoxanthine guanine phosphoribosyl  
231 transferase, Mm03024075\_m1) (Thermo Fisher, Waltham, Ma).

232

## 233 **Castration and ovariectomy**

234 To evaluate the sex differences of anal SCC development in KC mice, male WT and  
235 male KC mice were castrated; meanwhile, female WT and female KC mice were ovariectomized  
236 at 6-7 weeks of age. Mice were anesthetized with isoflurane inhalation throughout the surgery.  
237 Slow-release buprenorphine was used as an analgesic for mice undergoing this surgery. The  
238 hair from the surgical area was removed with clippers, and the surgical area was sterilized with  
239 an iodine scrub. Under sterile conditions and using sterilized tools, the testis and ovaries were  
240 removed from male and female mice, respectively[17,18]. To remove the testis, gentle pressure  
241 was applied to the abdomen to push the testis into the scrotal sac [17]. A short 10mm midline  
242 incision was made through the skin in the middle of the abdomen [17]. The testis were located,  
243 gently pulled out through that incision along with the epididymal fat pad and carefully removed  
244 via cauterization [17]. To remove the ovaries, two incisions were made: short dorsal midline  
245 incisions parallel to and on either side of the spine[18]. The ovaries were located and dissected  
246 free from attachments[18]. All incisions were sutured, wound clipped and sterile glue applied  
247 (vetbond).

248

## 249 **17-beta estradiol silastic capsule preparation and**

## 250 **administration**

251 KC mice were castrated or ovariectomized at age 6-7 weeks. The first 17-beta estradiol  
252 silastic capsule (or sham implant) was implanted 14 days later, and replaced every 4 weeks up  
253 to age 9 months. Silastic tubing (Silastic Laboratory Tubing, 1.58 mm inside diameter × 3.18

254 mm outside diameter, catalog no. 508-008, Dow Corning) was cut to 4.8mm. The tubing was  
255 sealed at one end with medical grade adhesive. The 4.8mm of the capsules was filled with 17-  
256 beta estradiol (E2) (17-beta estradiol, ≥99% pure, catalog no. 50-28-2). Silastic capsules were  
257 sealed with silastic medical adhesive, type A (product no. A-100, Dow Corning, purchased from  
258 Factor II). 17-beta Estradiol-filled silastic capsules have been shown to effectively increase  
259 estrogen levels in C57BL/6J mice when implanted as previously described[19,20]. Before  
260 implantation the capsules were soaked in sterile saline overnight at 37 °C. Mice were  
261 anesthetized with isoflurane for silastic capsule implantation and given slow-release  
262 buprenorphine (0.5 mg/kg sc). The back was shaved using clippers and sterilized with iodine  
263 scrub. An incision was made on the caudal aspect of the back just to the right of midline.  
264 Capsules were inserted parallel to the spine, and the incision was closed with wound clips.

265

## 266 **Statistical analysis**

267 Comparisons of tumor development between groups was accomplished using the fisher's  
268 exact test. The qPCR data was analyzed using an unpaired, two-tailed t-test with Welch's  
269 correction to evaluate possible expression differences of *Pdx1* and *Cre* in the sample groups.  
270 Data was considered significant with a *p*-value <0.05.

271

## 272 **Results**

### 273 **Development of anal tumors in KC mice**

274 Of the 30 KC mice (16 KC males and 14 KC females) initially evaluated, 16.7% (5/30)  
275 developed pancreatic ductal adenocarcinoma (PDAC), which is consistent with previously  
276 published incidence in KC mice (S1A Fig) [8]. There were no statistically significant differences  
277 between development of PDAC precursor lesions (PanIN-1, PanIN-2, or PanIN-3) or PDAC in  
278 male and female KC mice (S1B Fig). Furthermore, 66.7% (20/30) of the KC mice possessed at  
279 least one external tumor on the body surface. Concordant with previous publications, roughly  
280 36% of KC mice developed a facial lesion identified as facial papilloma [8,21] Notably, anal  
281 tumors were also observed and identified as invasive anal squamous cell carcinoma (anal SCC)  
282 on histopathologic analysis (Fig 1). The tumors became macroscopically visible after 5 months,

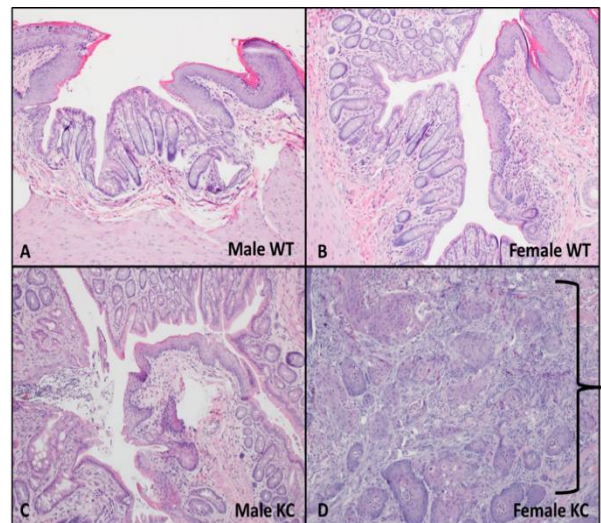

**Fig 1. Anal tumor development in KC mice.** At age 9 months, anorectal tissue was excised for histological analysis. In male (A) and female (B) C57Bl6 wild type mice, normal anorectal histology was present. Additionally, 9-month-old KC male mice (C) demonstrated normal anorectal histology. In contrast, large perianal tumors were grossly evident in 9-month-old female KC mice with invasive anal SCC present on histologic examination. This is indicated by the bracket (D).

283 were clearly evident by 6 months, and of significant size by 9 months (Fig 2). Mice with anal  
284 tumors displayed no increase in lethality, with normal mobility and weight gain up until the time  
285 of euthanasia (age 9 months). All anal SCC tumors were located at or just distal to the anorectal  
286 junction. All the tumors were characterized as grade 1. The neoplastic cells were well  
287 differentiated and easily recognized as squamous epithelium, infiltrating within a desmoplastic

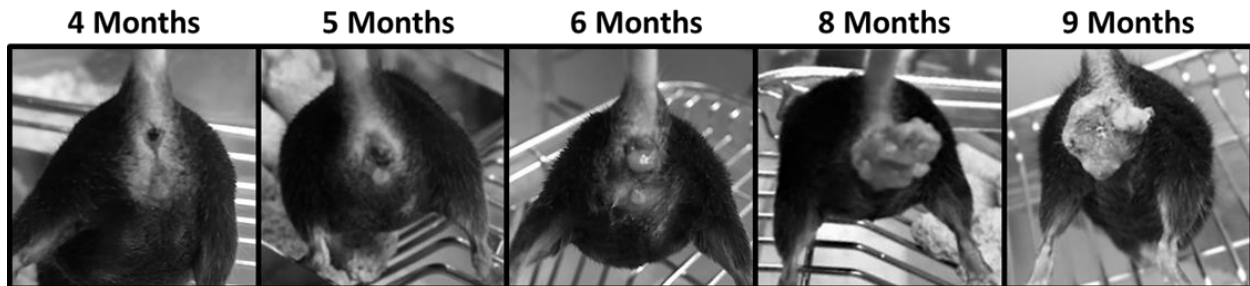

**Fig 2. Anal tumor progression over time.** In female KC mice, anal tumors are visible as an area of congestion at 4 months of age, with mild erythema around the anal region. By age 5 months, an anal tumor is generally evident. By 9 months of age, the anal tumors are significant in size. Despite the large size, the mice are able to maintain weight, consume food, and defecate normally. No mice experienced obstructive symptoms.

288 stroma with focal keratinization. Anal SCCs were localized to the anus, with no evidence of  
289 metastasis to distant organs. The pancreas, stomach, small intestine, colon, spleen, thymus,  
290 lungs and liver underwent gross analysis, but no evidence of metastasis from anal SCC tumors  
291 were found. Additionally, the stomach, spleen, pancreas, small intestine, and liver underwent  
292 histopathologic analysis with no evidence of metastatic spread. Only KC mice developed tumors  
293 (i.e. only mice possessing activated *Kras*-mutation), while age-matched male and female control  
294 mice did not develop external tumors (Table 1).

295

## 296 ***Sex significantly influences anal SCC tumor development in***

### 297 ***KC mice***

298 A significantly higher rate of external tumors was observed in female KC mice compared  
299 to male KC mice (100% vs 38%,  $p = 0.005$ ). While there was no difference in the incidence of

300 facial papilloma between the female and male KC mice (29% vs 38%,  $p = 0.65$ ), there was a  
301 stark difference in anal SCC incidence, which occurred exclusively in female KC mice (100% vs  
302 0%,  $p = 0.00001$ ) (Table 1).

303

**Table 1. Sex-Dependent Incidence of Skin and Anal Lesions**

| Group   | Mouse                                      | Facial Papilloma | Anal SCC              |
|---------|--------------------------------------------|------------------|-----------------------|
| Control | C57Bl6 Male (n = 12)                       | 0 / 12 (0%)      | 0 / 12 (0%)           |
|         | C57Bl6 Female (n = 11)                     | 0 / 11 (0%)      | 0 / 11 (0%)           |
|         | <i>Kras</i> <sup>G12D</sup> Male (n = 18)  | 0 / 18 (0%)      | 0 / 18 (0%)           |
|         | <i>Kras</i> <sup>G12D</sup> Female (n = 9) | 0 / 9 (0%)       | 0 / 9 (0%)            |
|         | <i>Pdx1-Cre</i> Male (n = 10)              | 0 / 10 (0%)      | 0 / 10 (0%)           |
|         | <i>Pdx1-Cre</i> Female (n = 23)            | 0 / 23 (0%)      | 0 / 23 (0%)           |
| KC Mice | KC Male (n = 16)                           | 6 / 16 (38%)     | 0 / 16 (0%)           |
|         | KC Female (n = 14)                         | 4 / 14 (29%)     | <b>14 / 14 (100%)</b> |

304 In addition to the sex-dependency of anal SCC development, there was complete  
305 penetrance (n = 14/14) of anal SCC in female KC mice. These findings were confirmed by  
306 histopathologic analysis, where excised anal tissue from wild type males, wild type females, and  
307 KC males demonstrated normal microscopic anal histology in comparison to the anal SCC seen  
308 in KC females (Fig 1). These findings demonstrate anal SCC development is dependent on sex.

309

## 310 **Anal carcinogenesis in KC mice was not due to** 311 **papillomavirus infection**

312 Mouse papillomavirus (MmuPV1) has been associated with the development of anal  
313 disease and cancer in mice [14,22]. The animal facility where the mice are housed is routinely  
314 screened for MmuPV1 and it has not been detected in our colony, and immunocompetent  
315 C57Bl6 mice are known to rapidly clear MmuPV1 before tumor development occurs [22].  
316 Furthermore, the anal tumors that developed in the KC mice were negative for characteristic  
317 features of papillomavirus-induced anal SCC during histopathologic evaluation. The overlying  
318 squamous mucosa did not exhibit koilocytosis, binucleation or raisanoid nuclei to suggest viral

319 cytopathic effect from histopathology of KC mouse anus (Figure 3A) [23]. Representative anal  
320 SCC tumors in KC mice were evaluated for MmuPV1 viral transcripts using RNAScope and for  
321 MmuPV1 DNA using PCR.[14] No MmuPV1 signal was detected by RNAScope (Fig 3A), and no  
322 MmuPV1 DNA was detected within the anal tumors of the KC mice (Fig 3B). Together, these  
323 data show that the anal SCC in this study was not driven by papillomavirus infection.

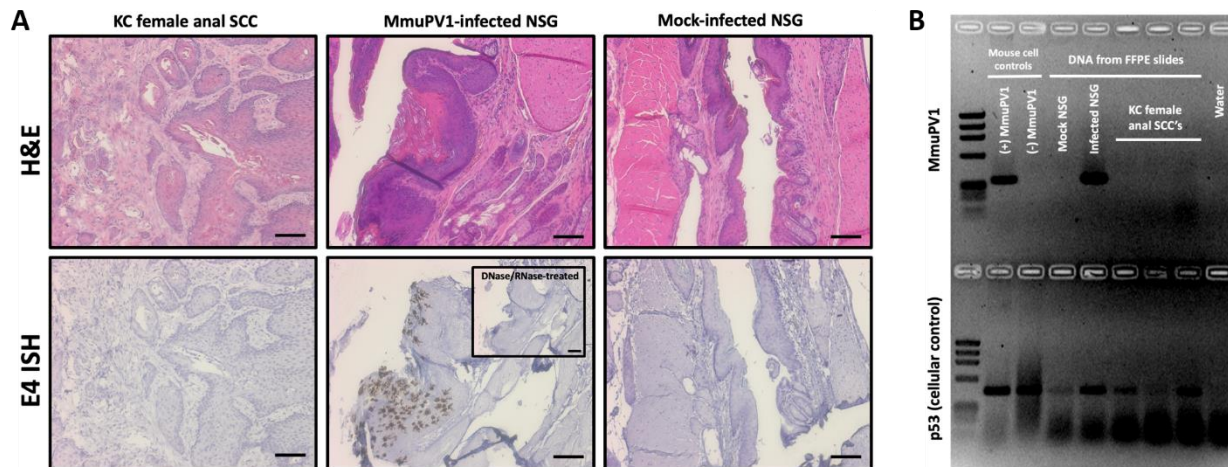

**Fig 3. Anal squamous cell carcinomas in KC mice were negative for MmuPV1 infection.** (A) No viral signatures were detected in representative anal tumors from KC mice stained via RNAScope ISH with a probe specific to the MmuPV1 E4 region of the genome. MmuPV1-infected and mock-infected Nod-*scid* IL2R $\gamma$ <sup>null</sup> (NSG) mouse anal tissues were included as positive and negative controls, respectively. Scale bars equal 100  $\mu$ m. (B) DNA was recovered from FFPE slides of representative KC female anal squamous cell carcinomas and MmuPV1-infected and mock-infected anal tissues, and PCR was performed using primers specific to the MmuPV1 genome. KC lesions were negative for MmuPV1 DNA.

324

### 325 ***Kras*<sup>G12D</sup> mutation is present in anal tissue of KC mice**

326 The absence of anal SCC in any control mice combined with the presence of anal  
327 tumors only in KC mice indicated *Kras*-mutation was likely responsible for the observed anal  
328 SCC. To confirm, we assessed anal tissue for expression of *Pdx1* mRNA, *Cre* mRNA, and  
329 activated *Kras*<sup>G12D</sup> mutation (genomic DNA) in both male and female mice (Fig 4-6). In the KC

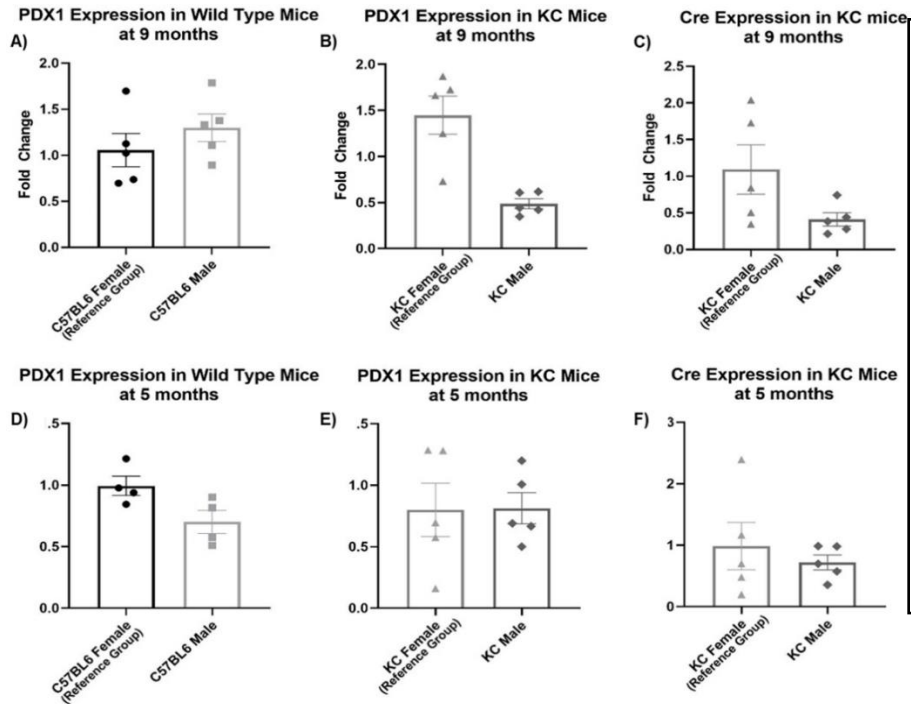

**Fig 4. Pdx1 expression and Cre-recombinase expression in mouse anus.** Anal tissue was excised from male and female wild type mice and male and female KC mice at 9 and 5 months of age. mRNA was isolated and RT-PCR performed to evaluate for *Pdx1* and *Cre*-recombinase expression. Male and female C57BL/6J WT mice demonstrate *Pdx1* expression in anal tissue at both 5 and 9 months, as did male and female KC mice (A,B,D,E). At 9 months age, KC females express significantly higher amounts of *Cre* mRNA (C) due to the presence of tumor tissue. At 5 months, male and female KC mice express similar amounts of *Pdx1* and *Cre* mRNA (E,F).

330 model, the *Pdx1* promoter mediates the expression of *Cre* recombinase in both male and  
331 female anal tissues. We compared *Pdx1* mRNA levels in male and female WT and KC mouse  
332 anus at nine months of age (Fig 4A and 4B), and found similar levels of *Pdx1* expression  
333 amongst the WT male and female mice (Fig 4A). The presence of *Pdx1* in anal tissue has also  
334 been identified in prior investigations [24]. At nine months, expression of *Pdx1* in KC female  
335 anus / anal tumor was significantly higher than KC male anus (Fig 4B). We concordantly found  
336 *Cre*-recombinase expression was significantly higher in KC females compared to KC males (Fig  
337 4C). WT mice did not express *Cre*-recombinase due to the absence of *Pdx1-Cre* transgene. The  
338 difference in *Pdx1* and *Cre* mRNA expression at nine months of age was likely related to  
339 evaluation of KC female anus / tumor (tumor tissue harboring more *Pdx1-Cre* expressing cells)  
340 versus non-tumor anal tissue of males. Thus, we assessed *Pdx1* and *Cre* expression at five  
341 months, prior to onset of macroscopic tumor and found no differences in levels of *Cre* and *Pdx1*  
342 expression between the groups of mice (Fig 4D-4F). To substantiate our expression data, we  
343 crossed the KC mice to Ai14 mice to generate the AiKC 'marker' mouse model (*Rosa26<sup>LSL</sup>-*  
344 *tdTomato* ; *LSLKras<sup>G12D</sup>* ; *Pdx1-Cre*). AiKC mice harbor the LSL-tdTomato red fluorescent protein in



345 the *Rosa26* locus, and in the presence of Cre-recombinase, the stop sequence is excised  
346 allowing for expression of tdTomato protein, localizing Pdx1 and Cre expression and serving as  
347 a marker for expression of activated *Kras*<sup>G12D</sup> gene. Both male and female AiKC mice (Fig 5)  
348 displayed tdTomato in the anal canal epithelium confirming Pdx1 and Cre expression and  
349 providing an expected localization for mutant *Kras*<sup>G12D</sup> expression. Concordantly, isolation of  
350 genomic DNA from anal tissue of male and female KC mice demonstrated the activated  
351 *Kras*<sup>G12D</sup> mutation (Fig 6 and S2 Fig), which was absent in WT mice. When excising the anus

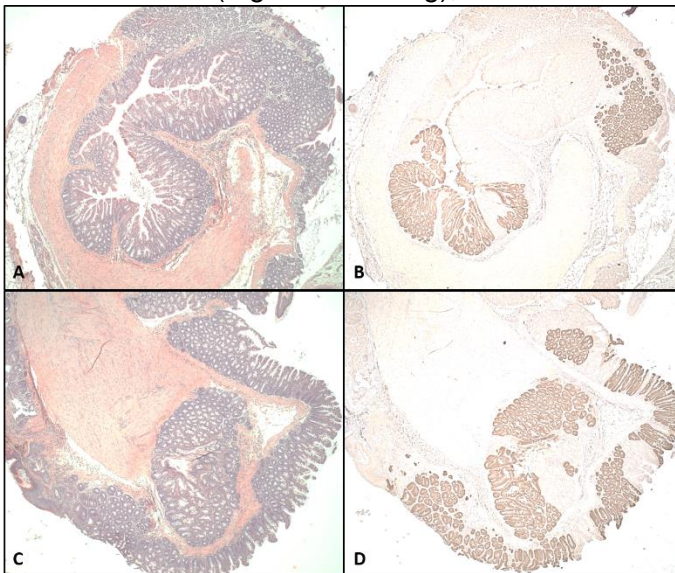

**Figure 5: Tdtomato expression indicates Pdx1-Cre expression and mutant *Kras* expression in both male and female mice.** Anal tissue was excised from 3 month old *Ai14 ; LSL-Kras*<sup>G12D</sup> ; *Pdx1-Cre* (*AiKC*) female (A, B) and male (C, D) mice, fixed and frozen embedded and sectioned for H&E analysis (A and C). Additional adjacent sections were prepared for immunohistochemistry (IHC) to identify tdTomato protein (B and D). Positive IHC signal for tdTomato reveals the location of Cre expression (*Pdx1-Cre*), which serves as a marker for the location of mutant *Kras*<sup>G12D</sup> expression.

352 from female KC mice, the specimen was removed *en bloc* with the large anal tumor, and DNA  
353 isolation revealed clear presence of the activated *Kras*<sup>G12D</sup> mutation (Fig 6, S2 Fig). The male  
354 KC anal tissue appeared grossly and histologically normal, yet genomic DNA isolated from  
355 whole anal tissue demonstrated the same activated *Kras*<sup>G12D</sup> mutation (Fig 6, S2 Fig). As a  
356 follow-up, the anus from KC mice at the earliest timepoint allowable (age 6-8 weeks) was  
357 excised and genomic DNA isolated (S3 Fig). Activated *Kras*<sup>G12D</sup>-mutation was present in both  
358 sexes indicating early expression of the oncogene. This was concurrent with the clear evidence  
359 of tdTomato (*Pdx1/Cre*) expression at age 12 weeks in the male and female AiKC mice.  
360 Interestingly, we were unable to detect a mutant-*Kras* band (or only a faint band) in one male  
361 KC mice (Fig 6), which was likely due to detection error from the excised anal samples. Thus, to  
362 confirm, we used FFPE sections generated from the 9-month male KC mice (cohort used to

363 evaluate for tumor formation) to specifically evaluate genomic DNA from the anal canal  
364 epithelium. These sections should harbor the activated *Kras*<sup>G12D</sup> mutation based on results of  
365 tdTomato staining (AiKC mice), and notably, we found that all male mice express mutant  
366 *Kras*<sup>G12D</sup> (S4 Fig). Together, these data demonstrate the presence of activated *Kras*<sup>G12D</sup>  
367 mutation in both male and female KC anus, yet an absence of tumor formation in male KC mice.  
368

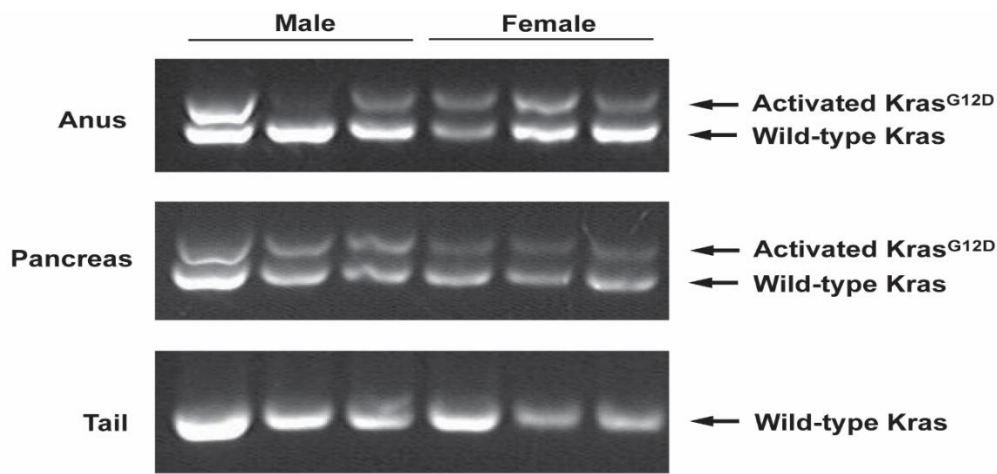

**Fig 6. Activated *Kras*<sup>G12D</sup> is present in the anal SCC anal tumor tissue.** The activated *Kras*<sup>G12D</sup> mutation is detected in the female anal tumor tissue, and the male anal tissues. Activated *Kras* refers to the successful removal of the *Lox-stop-Lox* codon preceding the *Kras*<sup>G12D</sup>. The activated mutation is present in the pancreas due to extensive *Pdx1* expression, and absent in tail samples, which lack *Pdx1* expression. Positive and negative controls are shown in supplemental figure 2.

### 369 ***Sex hormone dependence of anal SCC formation***

370 To discern why only female KC mice develop anal tumors despite the presence of  
371 activated *Kras*<sup>G12D</sup> mutation in both male and female KC mice, we assessed sex hormone  
372 dependence. The roles of male and female sex hormones in the development of these tumors  
373 were judged by castration of male mice (n = 11) and ovariectomy of female mice (n = 13) at 6-7  
374 weeks of age, according to standardized protocol.[17,18] Castration dramatically lowers the  
375 amount of testosterone that is produced in male mice[17] and, similarly, ovariectomy  
376 significantly lowers the amount of estrogen/progesterone produced in female mice.[18,25]

377 Castrated KC males displayed an unchanged phenotype compared to intact KC males, with  
 378 none of the mice developing anal SCC (0/11 KC castrated males vs 0/16 KC intact males,  $p =$   
 379 1) (Table 2). In contrast, ovariectomized KC female mice exhibited a striking change compared  
 380 to intact KC female mice, with only 15% of the ovariectomized cohort developing macroscopic  
 381 anal lesions (2/13 ovariectomized KC females vs 14/14 intact KC females ( $P < 0.0001$ )) (Table  
 382 2). This was confirmed on microscopic analysis, in which the eleven ovariectomized KC female  
 383 mice without macroscopic tumors demonstrated normal anal histology (i.e. no microscopic  
 384 tumors or dysplasia). (Figure 7). This remarkable finding indicates that female sex hormones  
 385 are crucial for *Kras*<sup>G12D</sup>-driven anal SCC development in KC mice.  
 386

**Table 2:** Sex-Dependent Incidence of Skin and Anal Lesions after Castration or Ovariectomy

| Group                                    | Mouse                                      | Facial Papilloma | Anal SCC     |
|------------------------------------------|--------------------------------------------|------------------|--------------|
| <b>Castrated/Ovariectomized Controls</b> | C57Bl6 Male (n = 2)                        | 0 / 2 (0%)       | 0 / 2 (0%)   |
|                                          | C57Bl6 Female (n = 2)                      | 0 / 2 (0%)       | 0 / 2 (0%)   |
|                                          | <i>Kras</i> <sup>G12D</sup> Male (n = 2)   | 0 / 2 (0%)       | 0 / 2 (0%)   |
|                                          | <i>Kras</i> <sup>G12D</sup> Female (n = 2) | 0 / 2 (0%)       | 0 / 2 (0%)   |
|                                          | Pdx1-Cre Male (n = 2)                      | 0 / 2 (0%)       | 0 / 2 (0%)   |
|                                          | Pdx1-Cre Female (n = 2)                    | 0 / 2 (0%)       | 0 / 2 (0%)   |
| <b>Castrated/Ovariectomized KC Mice</b>  | Castrated KC Male (n = 11)                 | 4 / 11 (33%)     | 0 / 11 (0%)  |
|                                          | Ovariectomized KC Female (n = 13)          | 4 / 13 (30%)     | 2 / 13 (15%) |

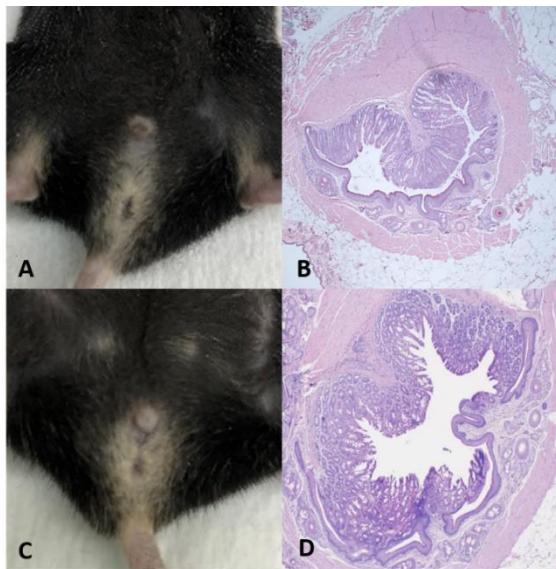

**Fig 7. Castrated and ovariectomized KC mice and assessment for anal tumor.** Male KC mice were castrated and female KC mice were ovariectomized at 6-7 weeks of age, and the anal tissue evaluated at age 9 months. Macroscopic examination revealed no abnormalities in castrated KC males and most ovariectomized KC females (representative images, A and C). Concordantly, histopathologic examination revealed no microscopic tumor formation in male KC mice or macroscopically normal ovariectomized KC female mice (representative images B and D, 40x) (D).

387 ***Estrogen dependence of anal SCC formation***

388 Estrogen has a known role in the development of several tumors [26–31] and a  
389 correlation with *Kras*-mutant cancer [28–31]. Thus, we tested whether the anal SCC tumor  
390 development in a papillomavirus-negative context was driven by estrogen. Ovariectomized and  
391 castrated KC mice were dosed with physiologic levels of 17- $\beta$ -estradiol (N=5 for ovariectomized  
392 and N=4 for castrated) or sham dosed as a control (N=6 for ovariectomized and N=5 for  
393 castrated). To confirm successful E2 administration, uterine weights were assessed (S5  
394 Fig).[20] E2 dosed females should remain in proestrus and thus have normal uterine weights  
395 while the sham dosed mice will have significantly lower uterine weights (S5A Fig) [20]. This  
396 standard approach enables accurate determination of estrogen reduction as opposed to a single  
397 timepoint (serum) which can vary substantially even in wild type (intact) mice.[20] Sham dosed  
398 mice demonstrated significant decrease in uterine weights confirming successful reduction in  
399 estrogen levels, while all E2 dosed female KC mice possessed normal uterine weights (i.e.  
400 intact) revealing appropriate and sufficient exogenous estrogen administration (S5A Fig). In the  
401 sham-dosed ovariectomized KC female group only 33% (2/6) developed a tumor (Table 3),  
402 concordant with results seen in the untreated ovariectomized mice (33% vs 15%, p-value =0.56)  
403 (Table 2). Meanwhile, in the beta-estradiol (E2) dosed ovariectomized KC female mice, 100%  
404 (5/5) developed macroscopically visible anal tumors by 4 months of age (Table 3), ‘rescuing’ the  
405 tumor phenotype and again demonstrating stark contrast to ovariectomized mice (100% vs  
406 15%, p-value = 0.001). In the sham-dosed castrated KC male group, 0% (0/5) developed a  
407 tumor (Table 3), consistent with the results seen in the untreated castrated KC male mice (0/5  
408 vs 0/11, p-value = 1). In contrast, 75% (3/4) of E2-dosed castrated KC male mice developed  
409 anal SCC that was macroscopically visible by 8 months of age and confirmed on histopathologic  
410 analysis (Fig 8). This remarkable and significant increase in tumor formation in E2-dosed KC  
411 males (75% vs 0%, p-value = 0.0088), when coalesced with the novel data from KC females,  
412 demonstrates an estrogen mediated sex-dependent development of *Kras*-mutant anal SCC.

413

**Table 3: Incidence of Anal SCC in beta-estradiol dosed KC mice**

| Group                                             | Mouse                                                 | Anal SCC              |
|---------------------------------------------------|-------------------------------------------------------|-----------------------|
| <b>Intact KC Mice</b>                             | Intact KC Male (n = 16)                               | 0 / 16 (0%)           |
|                                                   | Intact KC Female (n = 14)                             | <b>14 / 14 (100%)</b> |
| <b>Castrated/Ovariectomized KC Mice</b>           | Castrated KC Male (n = 11)                            | 0 / 11 (0%)           |
|                                                   | Ovariectomized KC Female (n = 13)                     | <b>2 / 13 (15%)</b>   |
| <b>Dosed and Castrated/Ovariectomized KC Mice</b> | Sham Dosed Castrated KC Male (n = 5)                  | 0 / 5 (0%)            |
|                                                   | Beta-Estradiol Dosed Castrated KC Male (n = 4)        | <b>3 / 4 (75%)</b>    |
|                                                   | Sham Dosed Ovariectomized KC Female (n = 6)           | <b>2 / 6 (33%)</b>    |
|                                                   | Beta-Estradiol Dosed Ovariectomized KC Female (n = 6) | <b>5 / 5 (100%)</b>   |

414

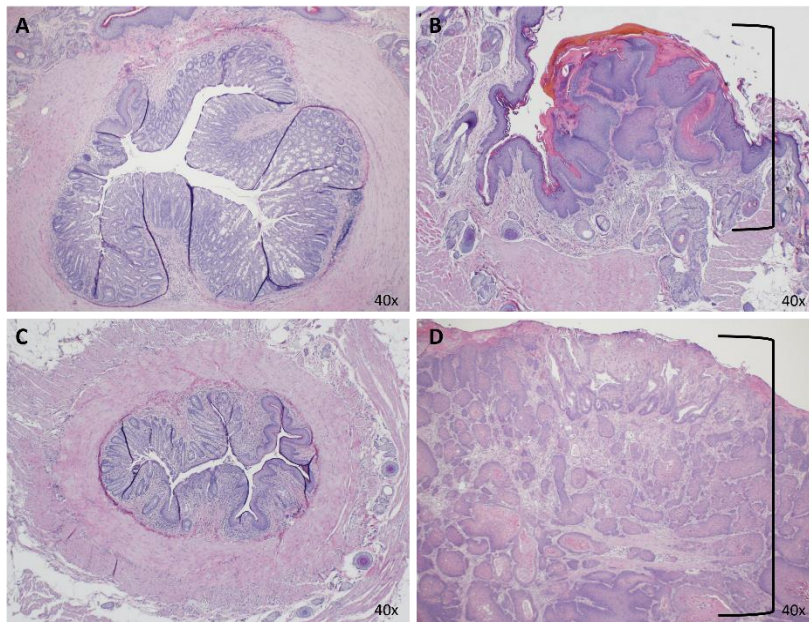

**Fig 8. Estrogen dosed castrated KC male develop anal SCC.** Castrated KC male mice and ovariectomized KC female mice were treated with 17-beta estradiol (E2) or sham (sesame oil). Sham dosed KC males did not develop anal SCC (A), while E2 dosing induced anal SCC in KC males (B, shown by bracket). Similarly, sham dosed KC females did not develop anal SCC (C) while E2 dosing rescued the anal SCC phenotype in KC females (D, shown by bracket).

415 **Estrogen Receptor present in male and female anus and**

416 **female anal tumors.**

417 Estrogen signaling is mediated through two distinct receptors, ER $\alpha$  and ER $\beta$ . [32] Estrogen

418 signaling through ER $\alpha$  has been shown to increase cellular proliferation, particularly within the

419 mammary gland and uterus, while ER $\beta$  has been shown to counteract the proliferative effects of

**Fig 9. Estrogen Receptor alpha (ER $\alpha$ ) is present in the KC anal tissue.** The presence of ER $\alpha$  was detected using immunofluorescent IHC. ER $\alpha$  was found to be present in the anal SCC of intact KC female mice (I), in the anal epithelium of ovariectomized KC female anus lacking tumor formation (II) and in the KC male anus (III). Panels A and B show the fluorescent staining of the receptor at 10x and 40x respectively. Panel C in each group shows the tissue with only the use of the secondary antibody confirming no off target staining. Group IV shows ER $\alpha$  staining of mouse arcuate nucleus as the positive control.[15]

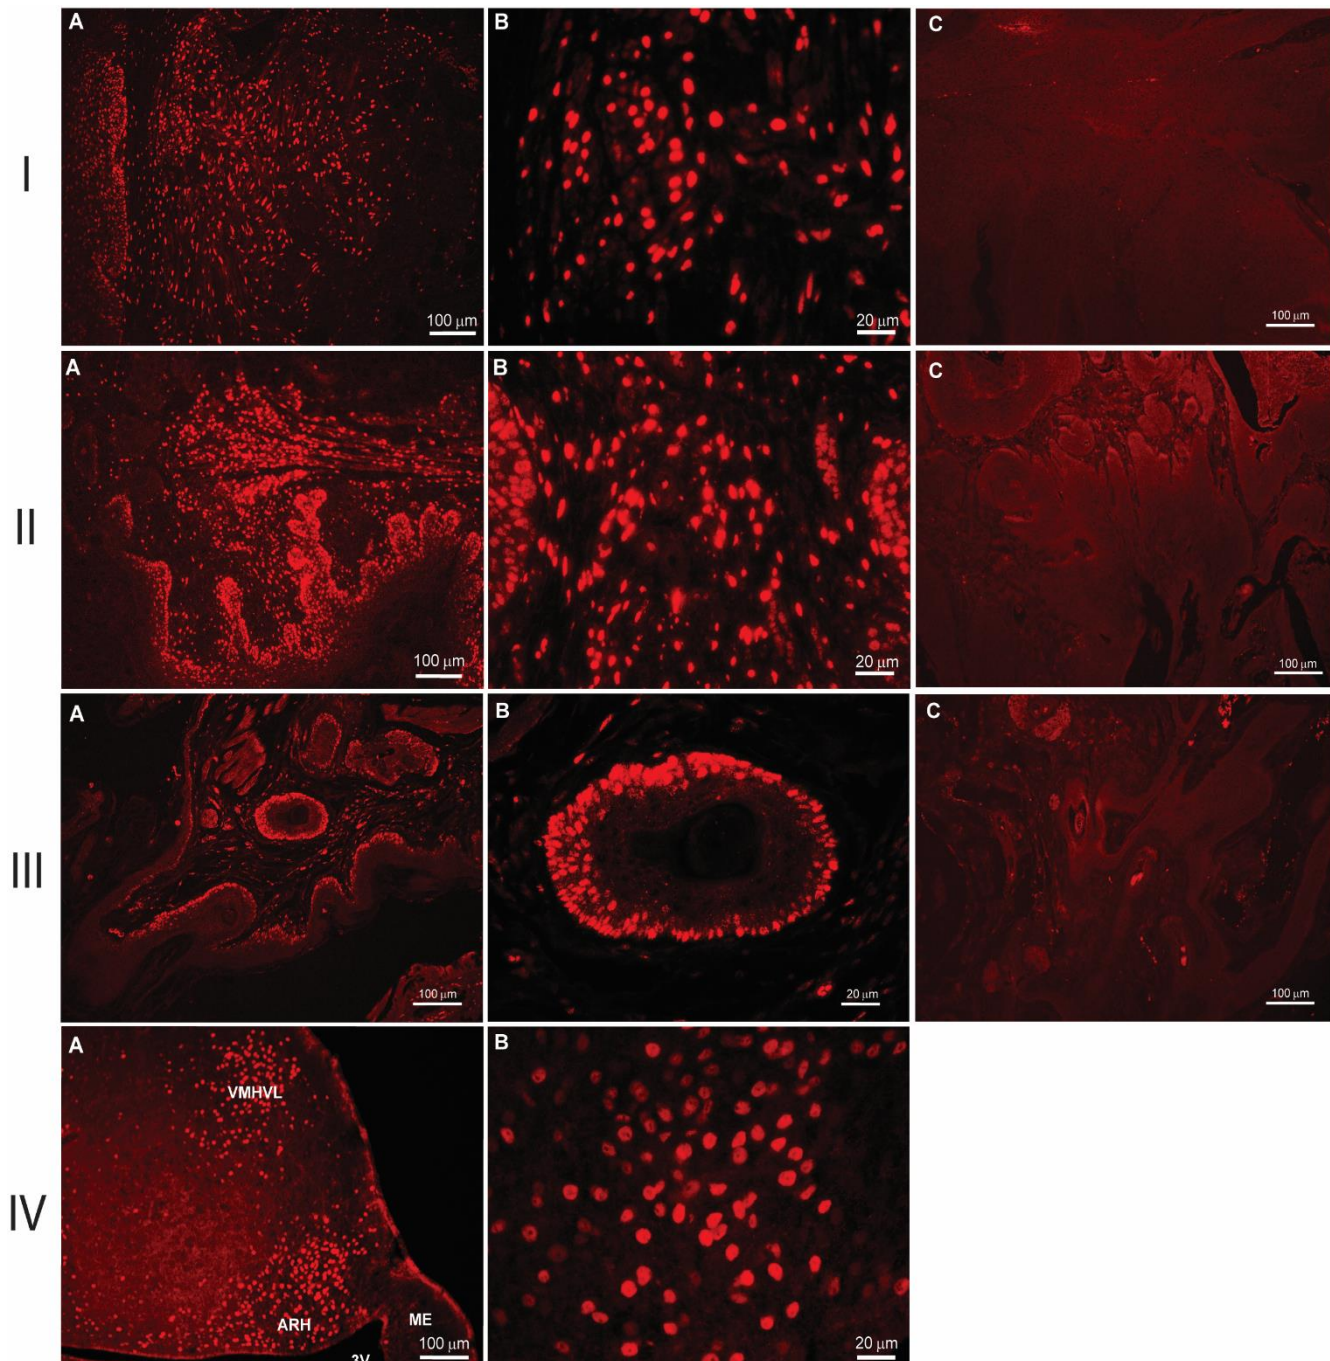

420 ER $\alpha$ . [32] Given the proliferation-inducing role of ER $\alpha$ , we expected that the anal epithelium and

421 anal tumors would display ER $\alpha$  expression. To investigate, we performed fluorescent IHC using  
422 an antibody specific for ER $\alpha$  [15] in the male and female anus. In particular, we assessed ER $\alpha$   
423 in intact KC females and found robust presence of ER $\alpha$  in the anal tumor (Fig 9). Moreover, we  
424 analyzed normal anus of ovariectomized KC females (no tumor) and KC males and again  
425 identified strong presence of ER $\alpha$  in the anal tissue, indicating exogenous estrogen in male (E2  
426 dosed) and endogenous estrogen in female KC mice can bind receptor to induce tumor  
427 formation (i.e. receptor is not just expressed in tumor). Together, this substantive data suggests  
428 that estrogen binding to ER $\alpha$  potentiates mutant-*Kras*<sup>G12D</sup> induced development of anal SCC in  
429 KC mice. (Fig 9).

430

## 431 Discussion

432 In this study, we identified that *LSL-Kras*<sup>G12D</sup>; *Pdx1-Cre* (KC) mice showed female-specific  
433 anal SCC development. Although this is a highly utilized genetically engineered mouse model in  
434 the study of PDAC, this novel phenotype has likely been overlooked for several reasons. While  
435 earlier studies of KC mice included only males, more recent investigations have included both  
436 male and female *Kras*-mutant mice to assess the development of PDAC. However, these  
437 studies focused on concomitant genetic mutations (e.g., *Trp53*, *Ink4a/Arf*)[9,33] or the influence  
438 of environmental changes (e.g., high-fat diet)[34] in addition to the *Pdx1-Cre* driven *Kras*<sup>G12D</sup>-  
439 mutation, which facilitate the onset of PDAC and consequent death at an early age (roughly four  
440 months for *LSL-Kras*<sup>G12D/+</sup>; *Trp53*<sup>-/-</sup>; *Pdx1-Cre* mice in our laboratory). Thus, because these  
441 tumors were only identifiable starting at 5-6 months age, studies with combination genetic  
442 mutations or environmental changes that caused earlier evaluation / demise in male and female  
443 KC mice may have conceivably missed the onset of anal SCC growth in female mice.

444 Approximately 85-95% of anal SCC development in humans is due to HPV infection, while  
445 the remaining 5-15% of cases occur from an unknown etiology.[4] Although mice can be

446 infected in the anal tract with the mouse papillomavirus MmuPV1 [14,22], the KC mice in this  
447 study did not develop anal SCC as a result of MmuPV1 or HPV infection. Immunocompetent  
448 mice, such as the KC mice, have been shown to rapidly clear MmuPV1 in the anal tract.[22]  
449 Furthermore, there was no evidence of papillomavirus in the colony of this study, on  
450 histopathologic analysis, using RNA Scope or via PCR analysis of the anal SCC that developed  
451 within the KC mice. This is an important finding when considering that roughly 5-15% of anal  
452 SCC patients do not harbor papillomavirus as the underlying etiology and suggests this is a  
453 potential model of interest in studying the etiology of non-papillomavirus induced anal SCC.

454 In this study, the development of anal SCC in the KC mice is due to the activation of the  
455 *Kras*<sup>G12D</sup> mutation in the anal tissue, which subsequently drives tumor formation. In the KC  
456 mouse model, the activation of the *Kras*<sup>G12D</sup> mutation is controlled by cells expressing Cre-  
457 recombinase from the *Pdx-1* promoter.[8] Although only female KC mice develop anal SCC,  
458 both sexes of KC mice were shown to have equivalent expression of *Pdx1* and *Cre* in the anal  
459 epithelium at age 5 months. Furthermore, the expression tdTomato was clearly evident in both  
460 male and female AiKC mouse anus, which reveals the location of Pdx1-mediated excision of  
461 lox-stop and consequent tdTomato expression (surrogate for location of *Kras*-mutation). Along  
462 with the observation that only KC mice formed anal SCC, this data shows that the development  
463 of anal SCC is driven by the expression of Pdx-1 and Cre in the anal tissue resulting in  
464 activation of the mutated *Kras*<sup>G12D</sup> gene. While we are not the first group to describe *Pdx1*  
465 expression outside the pancreas leading to the development of SCC tumors [24], to our  
466 knowledge, we are the first group to identify both *Pdx1* and activated *Kras*-mutation in anal  
467 tissue of KC mice and resultant anal SCC formation. Furthermore, the evidence presented  
468 disputes the possibility that sex-bias differences in anal tumor formation was simply due to the  
469 absence of *Pdx1*, *Cre* or activated *Kras*<sup>G12D</sup> expression in male anal tissue.

470 Notably, the activated *Kras*-mutation did not appear to be present (or very faintly present) in  
471 all male anal samples retrieved by whole-excision and analyzed by PCR (one sample of the 9



472 month cohort). This was likely due to detection error when isolating DNA from whole male anus  
473 (i.e. hair follicles, glands, skin, colon), which prompted PCR analysis of genomic DNA from  
474 FFPE anus samples (containing anal epithelium) to confirm the presence of activated *Kras*-  
475 mutation in KC male anus.

476 To understand the female sex predilection for development of anal SCC, we evaluated the  
477 roles of sex hormones, as these are likely candidates contributing towards the observed  
478 phenotype. We castrated male mice to achieve significant reduction in circulating testosterone  
479 and ovariectomized female mice to reduce systemic production of female sex hormones. This  
480 standard approach is the most accurate method to determine sex-hormone dependence.[17–20]  
481 Castration did not alter the anal phenotype of male KC mice suggesting that the lack of  
482 testosterone does not modify the development of anal SCC. In contrast, only two out of thirteen  
483 ovariectomized mice developed anal SCC suggesting the tumor development was almost  
484 entirely dependent on female physiologic levels of estrogen/progesterone.

485 To further evaluate the involvement of the female sex hormones, we dosed ovariectomized  
486 KC female mice and castrated KC male mice with estrogen to see if this would result in the  
487 tumor phenotype. We chose to evaluate estrogen because of the strong correlation with other  
488 *Kras*-driven cancers. For example, a study done by Hammond et al. [28] used *LSL-Kras<sup>G12D</sup>*  
489 mice (K mice in that study) to investigate the sex-differences seen in the development of lung  
490 adenocarcinomas. The methodology in this study included ovariectomy in female K mice  
491 followed by activation of the *Kras<sup>G12D</sup>*-mutation through intra-nasal exposure of an adenoviral  
492 vector expressing Cre recombinase (AdeCre). The authors found a significant reduction in lung  
493 tumor burden (quantity and size) compared to intact females. Concordant with the current study,  
494 they successfully rescued the phenotype through estrogen administration using silastic  
495 capsules.[28] Furthermore, studies have shown estrogen mediates the development of mutant-  
496 *Kras*-driven endometrial cancer, ovarian cancer and vaginal SCC.[29–31] It has been shown  
497 that ER $\alpha$  is present in 4% of human anal SCC samples[26] and that estrogen is essential for

498 activating cell proliferation of human epithelial SCC cell lines.[35] Thus, from these data, it is  
499 feasible that estrogens can ultimately influence *Kras*-induced non-papillomavirus anal SCC  
500 development, resulting in the sex-dependent development of anal SCC phenotype in female KC  
501 mice. Notably, in our study, ovariectomized KC mice that were dosed with physiologic levels of  
502 beta-estradiol (E2) developed anal SCC at 4 months of age, 'rescuing' the tumor phenotype.  
503 Furthermore, E2 dosed castrated KC male mice (equivalent dose as females) also developed  
504 anal SCC, albeit with a relatively delayed macroscopic onset (8 months) compared to E2 dosed  
505 females. This delayed onset despite equivalent E2 dosing may be due to differences in the  
506 number of ER $\alpha$  expressing cells or amount of ER $\alpha$  present in anal tissue, and will be evaluated  
507 in future studies. Regardless, the data presented strongly suggests that the development of anal  
508 SCC in KC mice is *Kras*-driven and estrogen mediated.

509 It is important to note that following reduction of estrogen (ovariectomy), 15% (2/13) of  
510 female KC mice and 2/6 (33%) sham dosed female KC mice still developed tumors. To confirm  
511 that our ovariectomized KC female mice did experienced a significant reduction in circulating  
512 estrogen, and that the E2 dosed mice possessed sufficient levels of circulating estrogen, we  
513 used a standardized approach of uterine weights. This methodology is more accurate than  
514 'single time point' levels of estrogen in circulating blood, due to the substantial variation of  
515 circulating estrogen in normal females.[20] In contrast, uterine weights reflect the steady levels  
516 of estrogen stimulation over an extended period. These techniques helped to confirm successful  
517 reduction of (ovariectomy) and rescue of (E2 dosed) circulating estrogen. Although our study  
518 revealed a clear correlation between estrogen and tumor formation, and a dramatic change in  
519 tumor phenotype with reduction of estrogen, it remains unclear why few ovariectomized KC  
520 mice still developed tumors; this may have been related to tumor initiation prior to the onset of  
521 ovariectomy. In follow up studies, we will use ER $\alpha$  knock out mice (B6.129P2-*Esr1*<sup>tm1Ksk/J</sup>)  
522 crossed to KC mice to investigate whether innate absence of estrogen to bind ER $\alpha$  prevents

523 tumor formation. It is also currently unknown how estrogen and mutant-*Kras* synergistically drive  
524 anal tumor formation. Interestingly, one group has developed a non-HPV model of anal  
525 carcinogenesis, using tamoxifen-inducible deletions of *Pten* and *Tgfb1*. [36] The authors found  
526 that anal SCC development was contingent upon STAT3 activation. [36] Cancers in other organ  
527 systems (e.g. pancreas cancer, lung cancer) have shown an interdependence between *Kras*<sup>G12D</sup>  
528 mutation and heightened STAT3 activity [37,38], and it has also been shown that estradiol  
529 functions to increase STAT3 activation. [39] For example, estradiol was shown to increase  
530 STAT3 activation in female rat brain which results in neuroprotection against ischemic brain  
531 injury. [39] The association between estrogen and STAT3 activation along with the association  
532 between STAT3 activity and mutant *Kras*<sup>G12D</sup>-induced cancer formation suggests a possible  
533 mechanism behind the phenotype of sex-dependent anal SCC development in KC mice.  
534 Subsequent analyses will aim to clarify these questions and study limitations, as well as focus  
535 on elucidating the specific underlying mechanism by which estrogen enhances *Kras*-mutant  
536 anal SCC development.

537 Our study clearly shows the sex-dependent development of anal SCC is tied to presence of  
538 physiologic levels of estrogen in female mice and characterizes a clinically relevant subtype of  
539 anal SCC. The finding that the *Kras*-mutation is largely dependent upon estrogen to induce  
540 tumor development is an exciting result that may have direct clinical applicability for patients  
541 with non-HPV anal SCC that have poorly understood pathogenesis and are known to exhibit  
542 resistance to standard of care therapy. [5] Additionally, with the previously unidentified  
543 observation of *Pdx1*-driven *Kras*-mutation present in anal tissue of KC mice, the novel  
544 phenotype described in this study may also provide a new mouse model for evaluation of the  
545 non-papillomavirus subtype of anal SCC.

546

547 **Acknowledgments:**

548 This work was supported by the American Cancer Society (grant number IRG-15-213-51). The  
549 authors would like to thank the Experimental Animal Pathology Lab (EAPL) supported by the  
550 UWCCC (P30 CA014520) for use of its facilities and services. The authors would also like to  
551 thank Dr. Jing Zhang for providing positive control DNA for activated *Kras*-mutation from the  
552 bone marrow of *LSL Kras/+; Mx-1 cre/+* mice, Dr. Paul Lambert for input regarding MmuPV1-  
553 mediated anal tumor formation (funding CA210807), and Dr. Chad Vezina for insight into  
554 investigating sex-hormone driven cancers. We also thank Ms. Martha A. Bosch for technical  
555 assistance.

556

557

## 558 References

- 559 1. Siegel RL, Miller KD, Fuchs HE, Jemal A. Cancer Statistics, 2021. *CA Cancer J Clin.* 2021;71: 7–33.  
560 doi:10.3322/caac.21654
- 561 2. Osborne MC. Anal squamous cell carcinoma: An evolution in disease and management. *World J*  
562 *Gastroenterol.* 2014;20: 13052. doi:10.3748/wjg.v20.i36.13052
- 563 3. Baricevic I, He X, Chakrabarty B, Oliver AW, Bailey C, Summers J, et al. High-sensitivity human  
564 papilloma virus genotyping reveals near universal positivity in anal squamous cell carcinoma:  
565 Different implications for vaccine prevention and prognosis. *Eur J Cancer.* 2015;51: 776–785.  
566 doi:10.1016/j.ejca.2015.01.058
- 567 4. Bernardi M-P, Ngan SY, Michael M, Lynch AC, Heriot AG, Ramsay RG, et al. Molecular biology of  
568 anal squamous cell carcinoma: implications for future research and clinical intervention. *Lancet*  
569 *Oncol.* 2015;16: e611–e621. doi:10.1016/S1470-2045(15)00292-2
- 570 5. Meulendijks D, Tomaso NB, Dewit L, Smits PHM, Bakker R, van Velthuysen M-LF, et al. HPV-  
571 negative squamous cell carcinoma of the anal canal is unresponsive to standard treatment and  
572 frequently carries disruptive mutations in TP53. *Br J Cancer.* 2015;112: 1358–1366.  
573 doi:10.1038/bjc.2015.20
- 574 6. Morris VK, Rashid A, Rodriguez-Bigas M, Das P, Chang G, Ohinata A, et al. Clinicopathologic  
575 Features Associated With Human Papillomavirus/p16 in Patients With Metastatic Squamous Cell  
576 Carcinoma of the Anal Canal. *The Oncologist.* 2015;20: 1247–1252.  
577 doi:10.1634/theoncologist.2015-0091
- 578 7. Chung JH, Sanford E, Johnson A, Klempner SJ, Schrock AB, Palma NA, et al. Comprehensive  
579 genomic profiling of anal squamous cell carcinoma reveals distinct genomically defined classes.  
580 *Ann Oncol.* 2016;27: 1336–1341. doi:10.1093/annonc/mdw152

- 581 8. Hingorani SR, Iii EFP, Maitra A, Rajapakse V, King C, Jacobetz MA, et al. Preinvasive and invasive  
582 ductal pancreatic cancer and its early detection in the mouse. *CANCER CELL*. 2003; 14.
- 583 9. Hingorani SR, Wang L, Multani AS, Combs C, Deramaudt TB, Hruban RH, et al. Trp53R172H and  
584 KrasG12D cooperate to promote chromosomal instability and widely metastatic pancreatic ductal  
585 adenocarcinoma in mice. *Cancer Cell*. 2005;7: 469–483. doi:10.1016/j.ccr.2005.04.023
- 586 10. Jackson EL. Analysis of lung tumor initiation and progression using conditional expression of  
587 oncogenic K-ras. *Genes Dev*. 2001;15: 3243–3248. doi:10.1101/gad.943001
- 588 11. Tuveson DA, Shaw AT, Willis NA, Silver DP, Jackson EL, Chang S, et al. Endogenous oncogenic K-  
589 rasG12D stimulates proliferation and widespread neoplastic and developmental defects. *Cancer*  
590 *Cell*. 2004;5: 375–387. doi:10.1016/S1535-6108(04)00085-6
- 591 12. Tien JC-Y, Chugh S, Goodrum AE, Cheng Y, Mannan R, Zhang Y, et al. AGO2 promotes tumor  
592 progression in KRAS-driven mouse models of non-small cell lung cancer. *Proc Natl Acad Sci*.  
593 2021;118: e2026104118. doi:10.1073/pnas.2026104118
- 594 13. Ramesh PS, Madegowda V, Kumar S, Narasimha S, R PS, Manoli NN, et al. DNA extraction from  
595 archived hematoxylin and eosin-stained tissue slides for downstream molecular analysis. *World J*  
596 *Methodol*. 2019;9: 32–43. doi:10.5662/wjm.v9.i3.32
- 597 14. Blaine-Sauer S, Shin M-K, Matkowskyj K, Ward-Shaw E, Lambert PF. A novel model for  
598 papillomavirus-mediated anal disease and cancer using the mouse papillomavirus. *mBio*.  
599 doi:<https://doi.org/10.1128/mBio.01611-21>
- 600 15. Friend KE, Resnick EM, Ang LW, Shupnik MA. Specific modulation of estrogen receptor mRNA  
601 isoforms in rat pituitary throughout the estrous cycle and in response to steroid hormones. *Mol*  
602 *Cell Endocrinol*. 1997;131: 147–155. doi:10.1016/S0303-7207(97)00098-1
- 603 16. Baker BB, Yee JS, Meyer DN, Yang D, Baker TR. Histological and Transcriptomic Changes in Male  
604 Zebrafish Testes Due to Early Life Exposure to Low Level 2,3,7,8-Tetrachlorodibenzo-*p*-Dioxin.  
605 *Zebrafish*. 2016;13: 413–423. doi:10.1089/zeb.2016.1275
- 606 17. Valkenburg KC, Amend SR, Pienta KJ. Murine Prostate Micro-dissection and Surgical Castration. *J*  
607 *Vis Exp*. 2016; 53984. doi:10.3791/53984
- 608 18. Souza V.R., Mendes E., Casaro M., Antiorio A.T.F.B., Oliveira F.A., Ferreira C.M. Description of  
609 Ovariectomy Protocol in Mice. ) *Pre-Clinical Models Methods in Molecular Biology*. New York, NY:  
610 Humana Press;
- 611 19. Van Steenbrugge GJ, Groen M, De Jong FH, Schroeder FH. The use of steroid-containing silastic  
612 implants in male nude mice: Plasma hormone levels and the effect of implantation on the weights  
613 of the ventral prostate and seminal vesicles. *The Prostate*. 1984;5: 639–647.  
614 doi:10.1002/pros.2990050610
- 615 20. Becker JB, Arnold AP, Berkley KJ, Blaustein JD, Eckel LA, Hampson E, et al. Strategies and Methods  
616 for Research on Sex Differences in Brain and Behavior. *Endocrinology*. 2005;146: 1650–1673.  
617 doi:10.1210/en.2004-1142

- 618 21. Schönhuber N, Seidler B, Schuck K, Veltkamp C, Schachtler C, Zukowska M, et al. A next-generation  
619 dual-recombinase system for time- and host-specific targeting of pancreatic cancer. *Nat Med.*  
620 2014;20: 1340–1347. doi:10.1038/nm.3646
- 621 22. Cladel NM, Budgeon LR, Balogh KK, Cooper TK, Brendle SA, Christensen ND, et al. Mouse  
622 papillomavirus infection persists in mucosal tissues of an immunocompetent mouse strain and  
623 progresses to cancer. *Sci Rep.* 2017;7: 16932. doi:10.1038/s41598-017-17089-4
- 624 23. Darragh TM, Colgan TJ, Thomas Cox J, Heller DS, Henry MR, Luff RD, et al. The Lower Anogenital  
625 Squamous Terminology Standardization Project for HPV-associated Lesions: Background and  
626 Consensus Recommendations From the College of American Pathologists and the American  
627 Society for Colposcopy and Cervical Pathology. *Int J Gynecol Pathol.* 2013;32: 76–115.  
628 doi:10.1097/PGP.0b013e31826916c7
- 629 24. Mazur PK, Grüner BM, Nakhai H, Sipos B, Zimber-Strobl U, Strobl LJ, et al. Identification of  
630 Epidermal Pdx1 Expression Discloses Different Roles of Notch1 and Notch2 in Murine KrasG12D-  
631 Induced Skin Carcinogenesis In Vivo. Bauer JA, editor. *PLoS ONE.* 2010;5: e13578.  
632 doi:10.1371/journal.pone.0013578
- 633 25. Koebele SV, Bimonte-Nelson HA. Modeling menopause: The utility of rodents in translational  
634 behavioral endocrinology research. *Maturitas.* 2016;87: 5–17.  
635 doi:10.1016/j.maturitas.2016.01.015
- 636 26. Wong NACS. Oestrogen receptor can be expressed by normal and dysplastic anal squamous  
637 epithelia but only rarely by anal squamous cell carcinoma. *Histopathology.* 2018;73: 1039–1040.  
638 doi:10.1111/his.13720
- 639 27. Zhang D, Ku J, Yi Y, Zhang J, Liu R, Tang N. The prognostic values of estrogen receptor alpha and  
640 beta in patients with gastroesophageal cancer: A meta-analysis. *Medicine (Baltimore).* 2019;98:  
641 e17954. doi:10.1097/MD.0000000000017954
- 642 28. Hammoud Z, Tan B, Badve S, Bigsby RM. Estrogen promotes tumor progression in a genetically  
643 defined mouse model of lung adenocarcinoma. *Endocr Relat Cancer.* 2008;15: 475–483.  
644 doi:10.1677/ERC-08-0002
- 645 29. Ring KL, Yates MS, Schmandt R, Onstad M, Zhang Q, Celestino J, et al. Endometrial Cancers With  
646 Activating KRas Mutations Have Activated Estrogen Signaling and Paradoxical Response to MEK  
647 Inhibition: *Int J Gynecol Cancer.* 2017;27: 854–862. doi:10.1097/IGC.0000000000000960
- 648 30. Kato S, McFall T, Takahashi K, Bamel K, Ikeda S, Eskander RN, et al. *KRAS*-MUTATED , Estrogen  
649 Receptor-Positive LOW-GRADE Serous Ovarian Cancer: Unraveling an Exceptional Response Mystery.  
650 *The Oncologist.* 2021;26. doi:10.1002/onco.13702
- 651 31. Wang X, Praça MSL, Wendel JRH, Emerson RE, DeMayo FJ, Lydon JP, et al. Vaginal Squamous Cell  
652 Carcinoma Develops in Mice with Conditional Arid1a Loss and Gain of Oncogenic Kras Driven by  
653 Progesterone Receptor Cre. *Am J Pathol.* 2021;191: 1281–1291. doi:10.1016/j.ajpath.2021.03.013

- 654 32. Paterni I, Granchi C, Katzenellenbogen JA, Minutolo F. Estrogen receptors alpha (ER $\alpha$ ) and beta  
655 (ER $\beta$ ): Subtype-selective ligands and clinical potential. *Steroids*. 2014;90: 13–29.  
656 doi:10.1016/j.steroids.2014.06.012
- 657 33. Aguirre AJ. Activated Kras and Ink4a/Arf deficiency cooperate to produce metastatic pancreatic  
658 ductal adenocarcinoma. *Genes Dev*. 2003;17: 3112–3126. doi:10.1101/gad.1158703
- 659 34. Chang H-H, Moro A, Takakura K, Su H-Y, Mo A, Nakanishi M, et al. Incidence of pancreatic cancer is  
660 dramatically increased by a high fat, high calorie diet in KrasG12D mice. Rومان I, editor. *PLOS*  
661 *ONE*. 2017;12: e0184455. doi:10.1371/journal.pone.0184455
- 662 35. Kato K, Ueoka Y, Kato K, Hachiya T, Nishida J, Wake N. Contribution of enhanced transcriptional  
663 activation by ER to [12Val] K-Ras mediated NIH3T3 cell transformation. *Oncogene*. 1997;15: 3037–  
664 3046. doi:10.1038/sj.onc.1201497
- 665 36. Bu L-L, Li Y-C, Yu G-T, Liu J-F, Deng W-W, Zhang W-F, et al. Targeting phosphorylation of STAT3  
666 delays tumor growth in HPV-negative anal squamous cell carcinoma mouse model. *Sci Rep*.  
667 2017;7: 6629. doi:10.1038/s41598-017-06643-9
- 668 37. Grabner B, Schramek D, Mueller KM, Moll HP, Svinka J, Hoffmann T, et al. Disruption of STAT3  
669 signalling promotes KRAS-induced lung tumorigenesis. *Nat Commun*. 2015;6: 6285.  
670 doi:10.1038/ncomms7285
- 671 38. D’Amico S, Shi J, Martin BL, Crawford HC, Petrenko O, Reich NC. STAT3 is a master regulator of  
672 epithelial identity and KRAS-driven tumorigenesis. *Genes Dev*. 2018;32: 1175–1187.  
673 doi:10.1101/gad.311852.118
- 674 39. Dziennis S, Jia T, Ronnekleiv OK, Hurn PD, Alkayed NJ. Role of Signal Transducer and Activator of  
675 Transcription-3 in Estradiol-Mediated Neuroprotection. *J Neurosci*. 2007;27: 7268–7274.  
676 doi:10.1523/JNEUROSCI.1558-07.2007
- 677
- 678

## 679 Supporting Information:

**S1 Fig. The incidence of pancreas pathology of male and female mice.** A) The incidence of pancreatic precursor lesions (PanIN-1, PanIN-2, PanIN-3) and PDAC in all the KC mice match what was previously reported in this model. B) There is no statistically significant differences in development of pancreatic pathology between male (n= 16) and female KC (n = 14) mice. Both male and female show a 100% incidence of PanIN 1 (p-value = 1). For PanIN1, PanIN 2, PanIN 3 and PDAC male vs female incidence with their p-values are as follows: 100% vs 100% (p = 1), 6.25% vs 7.15% (P > 0.99 ), 0% vs 21.43% (P = 0.09) and 6.25% vs 28.57% (P = 0.16)

680

681

**A Incidence of Pancreas Pathology in all KC Mice**

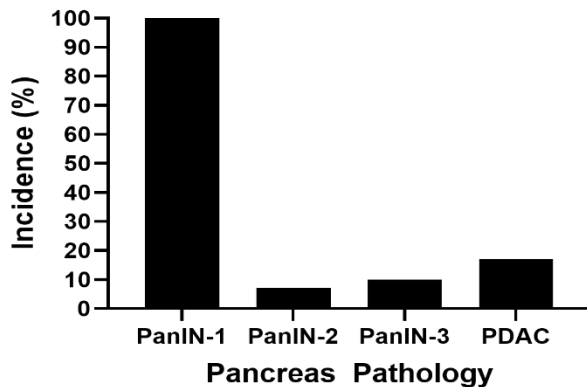

**B Sex Dependent Incidence of Pancreas Pathology**

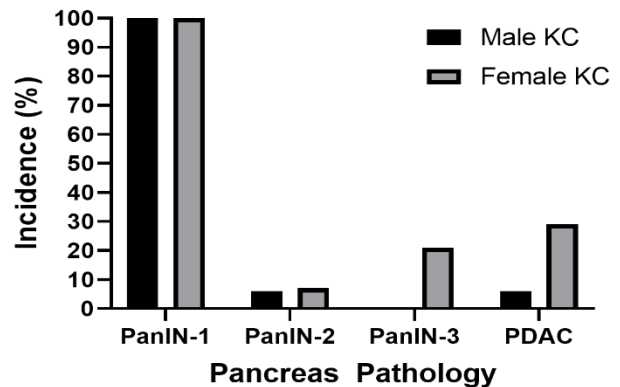



682  
683  
684  
685  
686  
687

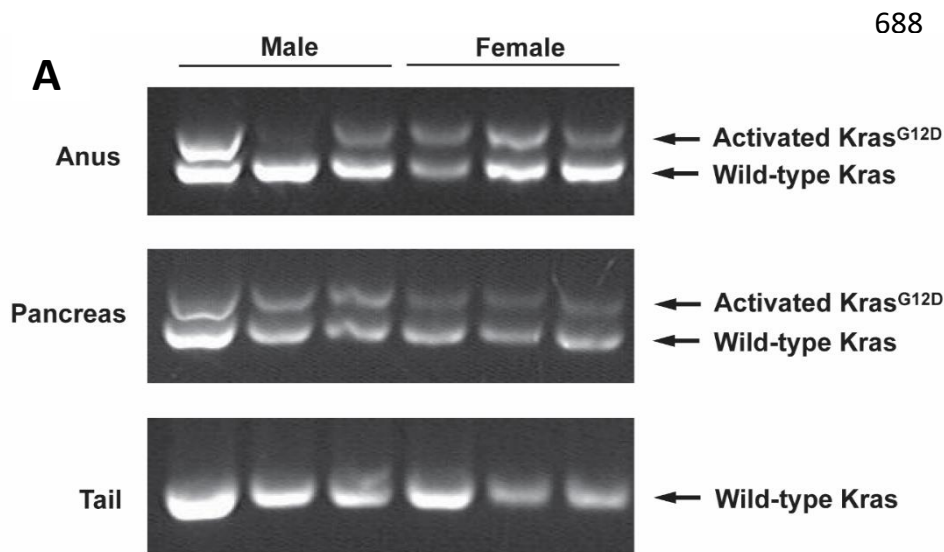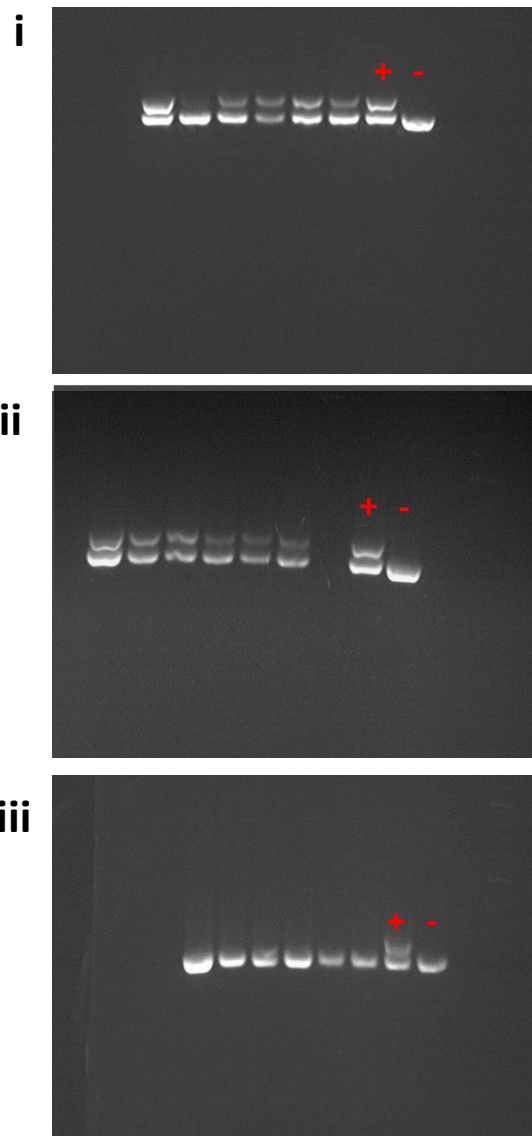

697  
698  
699  
700

701 **S2 Fig. Genotyping for mutated Kras gene in 9 month old male and female KC mice.** Full gel images of  
70 mutated Kras Genotyping in 9 month old male and female anus (i), pancreas (ii) and tail (iii) next to the  
70 cropped image used in the manuscript text (A). The '+' and '-' indicate the positive and negative control  
70 bands on each gel. The positive control is DNA from *LSL Kras*<sup>+/+</sup>; *Mx-1 cre*<sup>+/+</sup> mouse bone marrow containing  
70 the activated *Kras* gene (Control (+)) and the negative control is DNA from the pancreas of a C57BL6/J mice  
70 (Control (-)).

706  
707

708  
709  
710  
711  
712  
713  
714

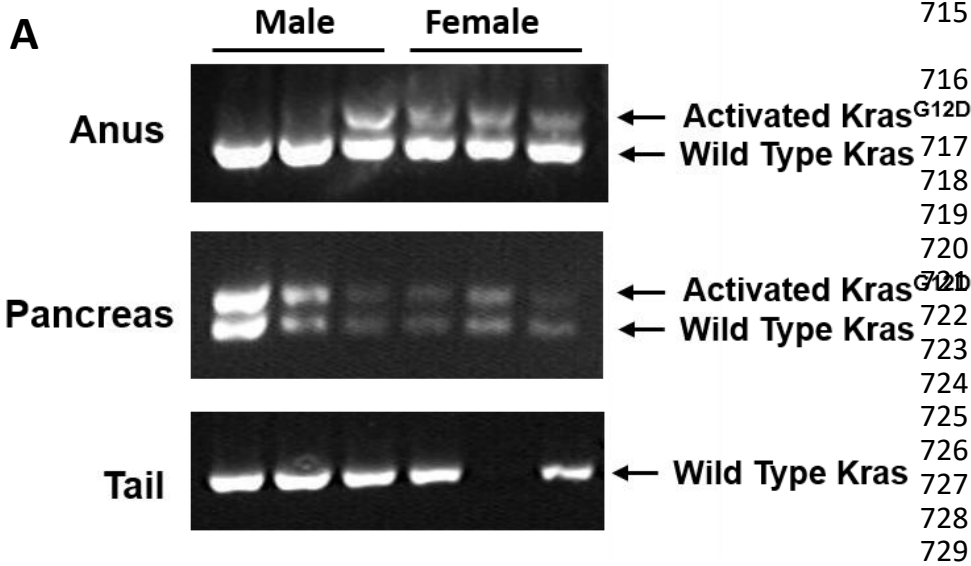

715  
716  
717  
718  
719  
720  
721  
722  
723  
724  
725  
726  
727  
728  
729

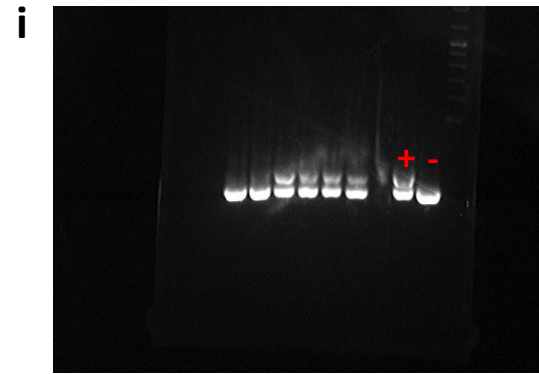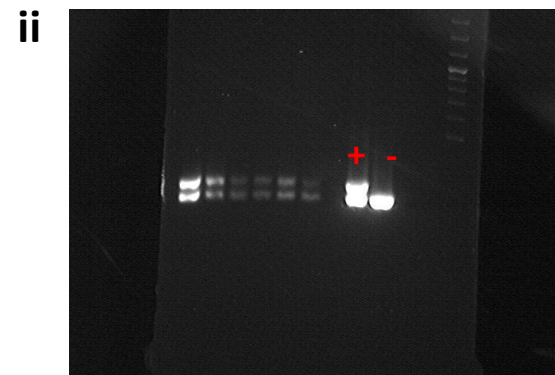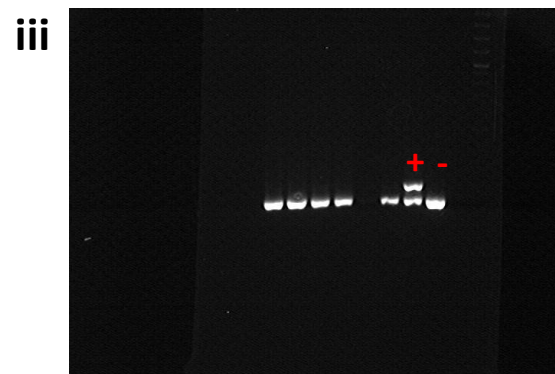

730  
731  
732  
733  
734  
735  
736  
737  
738  
739

**S3 Fig. Genotyping for mutated *Kras* gene in 8 week old male and female KC mice. A)** Full gel images taken of the PCR product. This shows that there are male KC anus's with the mutated *kras* gene activated at an early age (8 weeks old). Despite the active mutated *kras* gene being present, no males develop anal SCC. The full gel images for the anus (i), pancreas (ii) and tail (iii) are to the right of the full image. The '+' and '-' indicate the positive and negative control bands on each gel. The positive control is DNA from *LSL Kras*+/+; *Mx-1 cre*+/+ mouse bone marrow containing the activated *Kras* gene (Control (+)) and the negative control is DNA from the pancreas of a C57BL6/J mice (Control (-)).

749

**S4 Fig. Anus from male KC mice display the activated *Kras* mutation.** Genomic DNA was isolated from the available FFPE samples from age 9 month male KC mice and analyzed using PCR for the activated *Kras* mutation. All male anus showed the presence of the activated *Kras* mutation within the anal tissue (A). The full gel is shown in panel B.

755  
756  
757

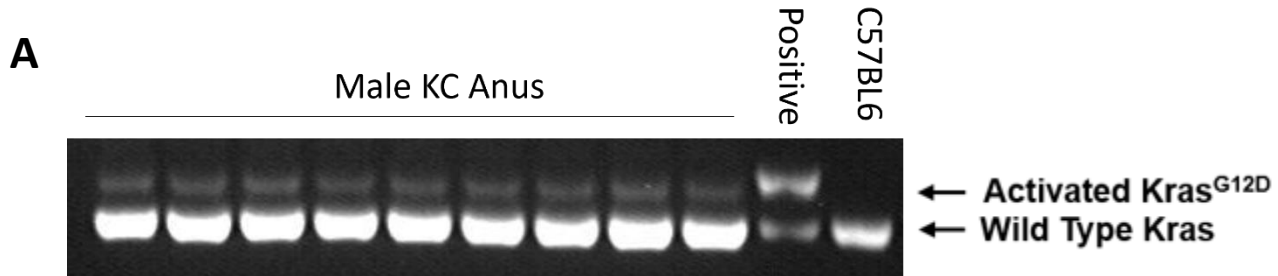

758  
759  
760  
761  
762  
763

**B**

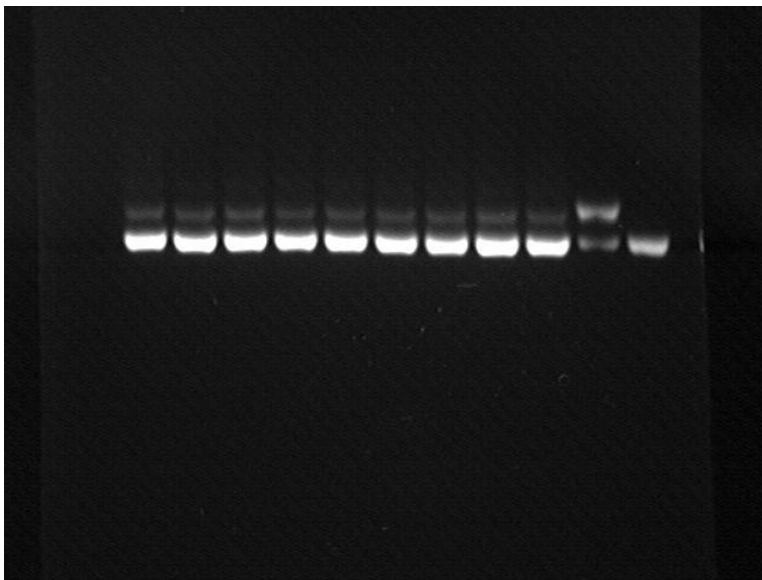

765  
766  
767  
768  
769  
770  
771  
772  
773

774  
775  
776  
777  
778  
779

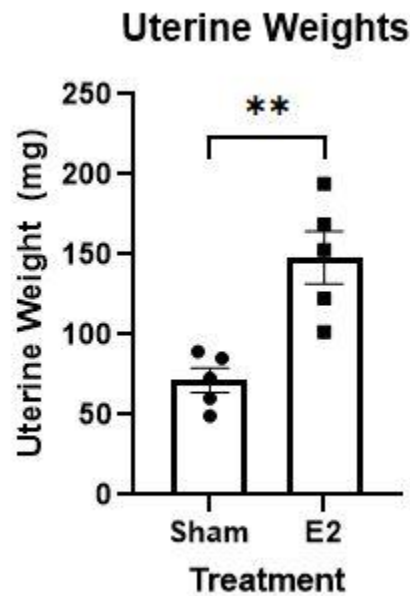

**S5 Fig. E2 dosed females show increased Uterine weights consistent with E2 dosing.** The E2 dosed female mice have a significantly increased uterine weight compared to the sham dosed mice indicating successful E2 administration.
